# Supplementary material
Source: PubMed Central journal article supplement (PMC4816655)
Supplement: NIHMS770464-supplement-supplement_1.pdf [file NIHMS770464-supplement-supplement_1.pdf]

## Supplemental Materials

**Supplemental-Table 1. Characteristics of study population at baseline by E2 groups**

| <b>Characteristics</b>                 | <b>Low E2<br/>N=207</b> | <b>Medium E2<br/>N=256</b> | <b>High E2 - Early Decline<br/>N=350</b> | <b>High E2 - Late Decline<br/>N=43</b> | <b>P<br/>value</b> |
|----------------------------------------|-------------------------|----------------------------|------------------------------------------|----------------------------------------|--------------------|
| Age, years, Mean(SD)                   | 46.14 (2.68)            | 45.54 (2.63)               | 45.86 (2.59)                             | 44.63 (2.38)                           | 0.002              |
| BMI, kg/m <sup>2</sup> , Mean (SD),    | 25.94 (5.47)            | 31.73 (7.68)               | 26.37 (6.14)                             | 29.16 (7.27)                           | <0.001             |
| SBP, mmHg, Mean (SD)                   | 114.95 (16.05)          | 119.98 (17.21)             | 115.79 (17.91)                           | 112.42 (10.45)                         | 0.002              |
| DBP, mmHg, Mean (SD)                   | 73.72 (10.42)           | 75.27 (10.47)              | 73.91 (11.01)                            | 73.22 (9.68)                           | 0.31               |
| HDL-C, mg/dL, Mean (SD)                | 57.73 (13.26)           | 53.36 (13.26)              | 59.70 (13.94)                            | 52.09 (12.25)                          | <0.001             |
| LDL-C, mg/dL, Mean (SD)                | 111.36 (27.40)          | 117.86 (30.70)             | 112.75 (29.16)                           | 115.93 (29.47)                         | 0.08               |
| Triglycerides, mg/dL, Median (Q1, Q3), | 95.00 (66.00, 139.50)   | 88.00 (63.00, 128.00)      | 78.00 (61.00, 108.00)                    | 101.00 (71.00, 123.00)                 | <0.001             |
| HOMA index, Median (Q1, Q3),           | 1.79 (1.33, 2.66)       | 2.47 (1.58, 3.56)          | 1.72 (1.23, 2.40)                        | 2.54 (1.45, 4.12)                      | <0.001             |
| Physical activity score, Mean (SD)     | 7.51 (1.81)             | 7.67 (1.79)                | 7.80 (1.79)                              | 7.80 (1.87)                            | 0.32               |

**Supplemental-Table 2. Characteristics of study population at baseline by FSH groups**

| <b>Characteristics</b>                 | <b>Low FSH<br/>N=53</b> | <b>Medium FSH<br/>N=431</b> | <b>High FSH<br/>N=372</b> | <b>P value</b> |
|----------------------------------------|-------------------------|-----------------------------|---------------------------|----------------|
| Age, years, Mean(SD)                   | 45.07 (2.48)            | 45.45 (2.48)                | 46.24 (2.73)              | <0.001         |
| BMI, kg/m <sup>2</sup> , Mean (SD),    | 35.92 (9.65)            | 28.98 (6.88)                | 25.75 (5.48)              | <0.001         |
| SBP, mmHg, Mean (SD)                   | 118.94 (14.35)          | 116.92 (16.63)              | 116.05 (17.94)            | 0.47           |
| DBP, mmHg, Mean (SD)                   | 76.51 (9.87)            | 74.36 (10.65)               | 73.77 (10.73)             | 0.20           |
| HDL-C, mg/dL, Mean (SD)                | 47.13 (9.60)            | 56.06 (13.54)               | 59.33 (13.84)             | <0.001         |
| LDL-C, mg/dL, Mean (SD)                | 111.92 (27.51)          | 115.17 (29.38)              | 113.26 (29.50)            | 0.58           |
| Triglycerides, mg/dL, Median (Q1, Q3), | 104.00 (78.00, 129.00)  | 89.00 (65.00, 128.00)       | 79.00 (61.00, 109.00)     | 0.003          |
| HOMA index, Median (Q1, Q3),           | 2.81 (1.85, 7.08)       | 2.15 (1.42, 3.24)           | 1.71 (1.23, 2.46)         | <0.001         |
| Physical activity score, Mean (SD)     | 6.99 (1.59)             | 7.78 (1.86)                 | 7.69 (1.74)               | 0.01           |
